# Supplementary material
Source: HighWire-hosted journal article supplement (https://jnm.snmjournals.org/highwire/filestream/99540/field_highwire_adjunct_files/0/244061_Supplemental_Data.pdf)
Supplement: 244061_Supplemental_Data.pdf [file 244061_Supplemental_Data.pdf]

Contrast: A+T+N+ > A-(T+)N+

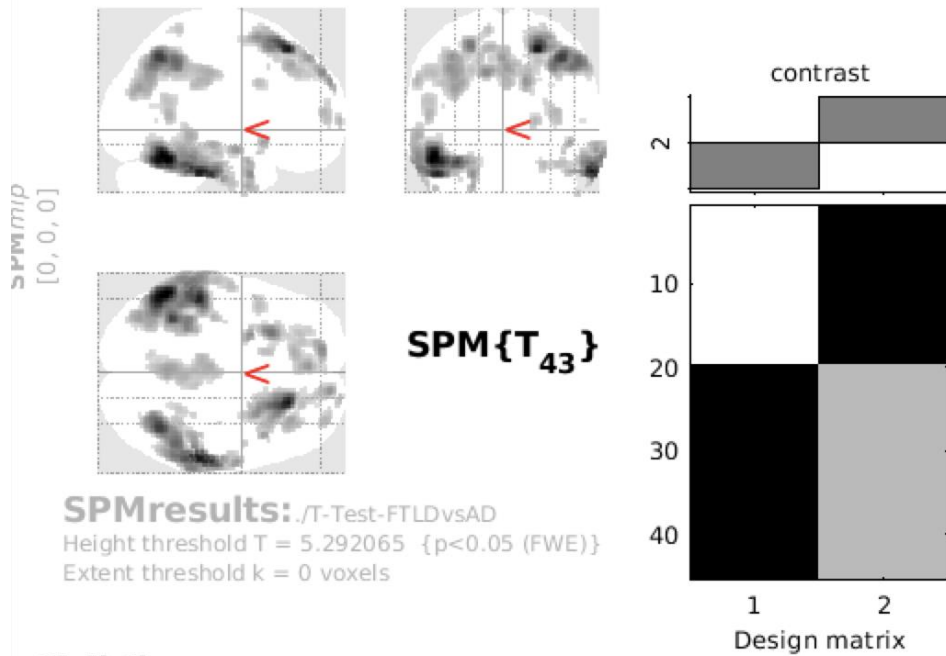

**Statistics:  $p$ -values adjusted for search volume**

| set-level |     | cluster-level  |                |       |              | peak-level     |                |      |                |              | mm mm mm |     |     |
|-----------|-----|----------------|----------------|-------|--------------|----------------|----------------|------|----------------|--------------|----------|-----|-----|
| $p$       | $c$ | $p_{FWE-corr}$ | $q_{FDR-corr}$ | $k_E$ | $p_{uncorr}$ | $p_{FWE-corr}$ | $q_{FDR-corr}$ | $T$  | $(Z_{\equiv})$ | $p_{uncorr}$ |          |     |     |
| 0.000     | 26  | 0.000          | 0.000          | 2004  | 0.000        | 0.000          | 0.001          | 8.97 | 6.70           | 0.000        | -52      | -54 | -22 |
|           |     |                |                |       |              | 0.000          | 0.003          | 8.29 | 6.37           | 0.000        | -48      | -32 | -32 |
|           |     |                |                |       |              | 0.000          | 0.009          | 7.75 | 6.10           | 0.000        | -34      | -52 | -24 |
|           |     | 0.000          | 0.000          | 796   | 0.000        | 0.000          | 0.002          | 8.51 | 6.48           | 0.000        | 60       | -32 | -30 |
|           |     |                |                |       |              | 0.000          | 0.006          | 8.01 | 6.23           | 0.000        | 62       | -24 | -32 |
|           |     |                |                |       |              | 0.000          | 0.016          | 7.51 | 5.97           | 0.000        | 60       | -42 | -26 |
|           |     | 0.000          | 0.000          | 981   | 0.000        | 0.000          | 0.002          | 8.48 | 6.47           | 0.000        | 22       | 30  | 52  |
|           |     |                |                |       |              | 0.001          | 0.122          | 6.62 | 5.47           | 0.000        | 28       | 8   | 60  |
|           |     |                |                |       |              | 0.002          | 0.143          | 6.47 | 5.37           | 0.000        | 14       | 58  | 32  |
|           |     | 0.000          | 0.000          | 960   | 0.000        | 0.000          | 0.008          | 7.82 | 6.13           | 0.000        | 38       | -58 | 46  |
|           |     |                |                |       |              | 0.000          | 0.037          | 7.18 | 5.79           | 0.000        | 50       | -48 | 44  |
|           |     | 0.000          | 0.000          | 743   | 0.000        | 0.000          | 0.063          | 6.94 | 5.65           | 0.000        | -26      | 18  | 54  |
|           |     |                |                |       |              | 0.001          | 0.125          | 6.60 | 5.45           | 0.000        | -14      | 54  | 36  |
|           |     |                |                |       |              | 0.002          | 0.156          | 6.42 | 5.35           | 0.000        | -2       | 44  | 46  |
|           |     | 0.000          | 0.004          | 115   | 0.001        | 0.001          | 0.132          | 6.55 | 5.43           | 0.000        | -24      | 4   | -32 |
|           |     |                |                |       |              | 0.004          | 0.215          | 6.22 | 5.23           | 0.000        | -24      | 2   | -24 |
|           |     |                |                |       |              | 0.004          | 0.215          | 6.20 | 5.21           | 0.000        | -24      | 2   | -40 |
|           |     | 0.000          | 0.000          | 1491  | 0.000        | 0.002          | 0.132          | 6.52 | 5.41           | 0.000        | -38      | -62 | 48  |
|           |     |                |                |       |              | 0.002          | 0.140          | 6.49 | 5.39           | 0.000        | -38      | -66 | 40  |
|           |     |                |                |       |              | 0.003          | 0.168          | 6.35 | 5.31           | 0.000        | -36      | -74 | 26  |
|           |     | 0.000          | 0.000          | 964   | 0.000        | 0.003          | 0.176          | 6.33 | 5.29           | 0.000        | 0        | -54 | 40  |

table shows 3 local maxima more than 8.0mm apart

Height threshold:  $T = 5.29$ ,  $p = 0.000$  (0.050) Degrees of freedom = [1.0, 43.0]  
 Extent threshold:  $k = 0$  voxels FWHM = 14.8 14.5 14.1 mm mm mm; 7.4 7.3 7.1 {voxel  
 Expected voxels per cluster,  $\langle k \rangle = 8.970$  Volume: 1766640 = 220830 voxels = 543.4 resels  
 Expected number of clusters,  $\langle c \rangle = 0.05$  Voxel size: 2.0 2.0 2.0 mm mm mm; (resel = 380.76 voxels)  
 FWEp: 5.292, FDRp: 7.183, FWEc: 1, FDRc: 67 Page 1

SUPPLEMENTAL FIGURE 1: Result of voxel wise T-test in SPM comparing A+T+N+ to A-(T+)N+.

Contrast: A+T+N+ > A-(T+)N+

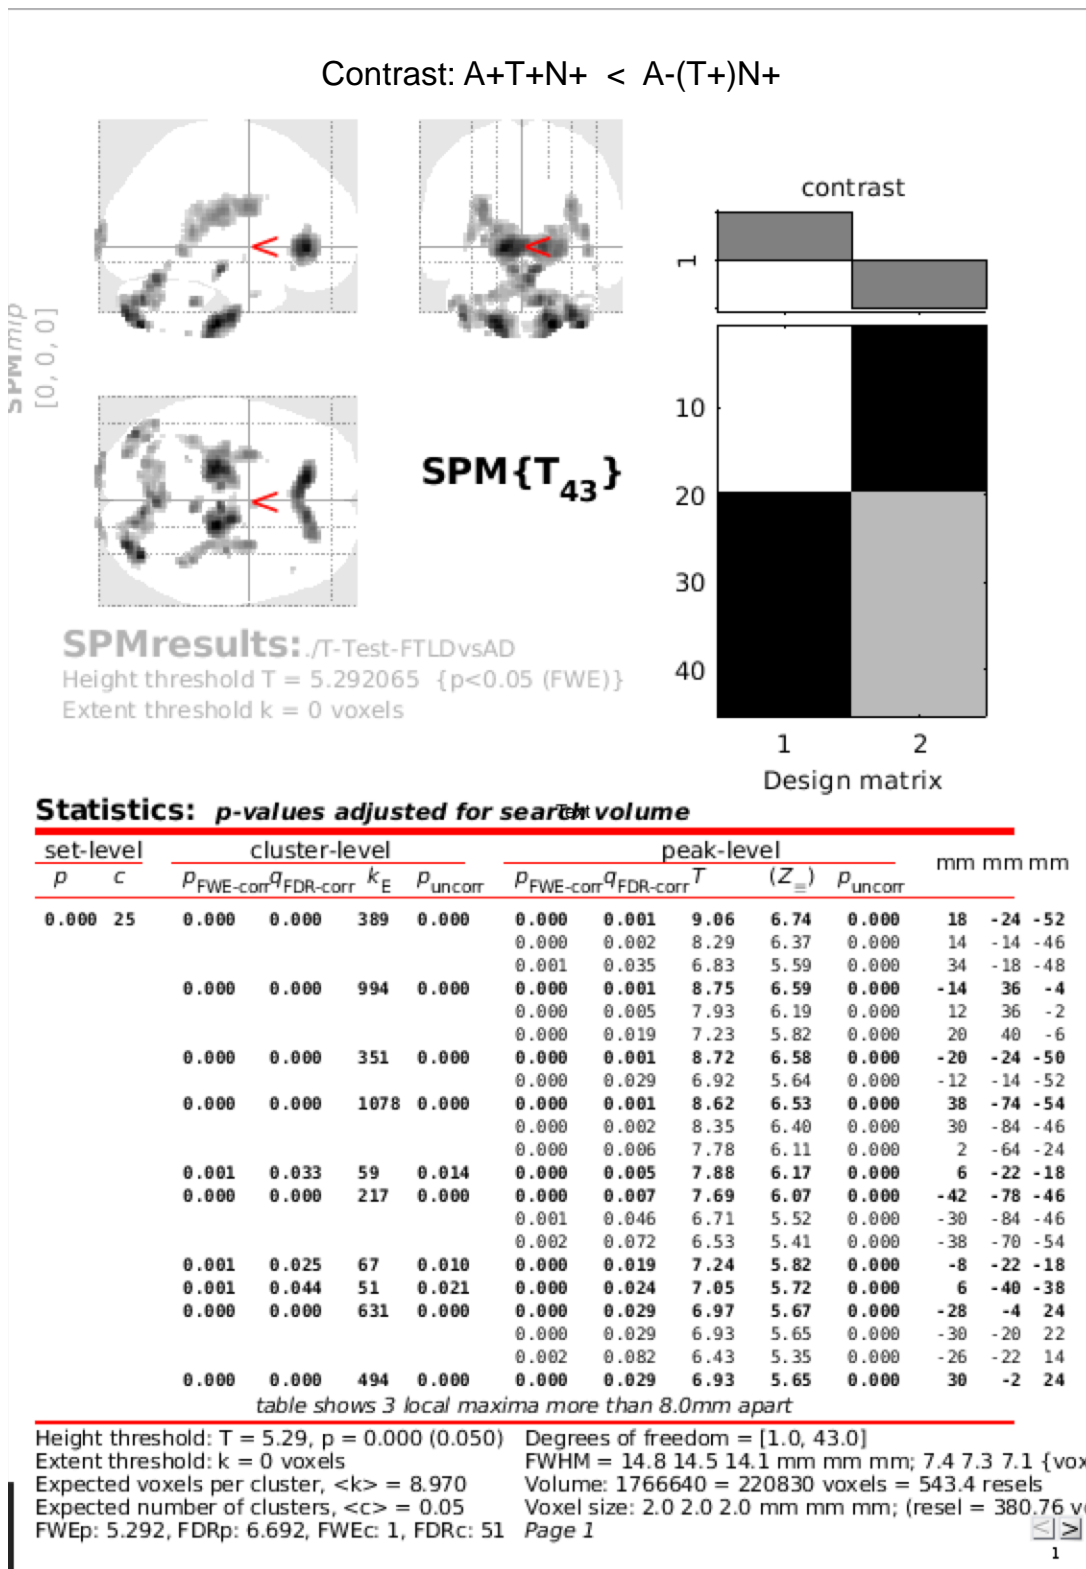

SUPPLEMENTAL FIGURE 2: Result of voxel wise T-test in SPM comparing A+T+N+ to A-(T+)N+.

Contrast: A+T+N+ < A-(T+)N+
